# Supplementary figures and images for: Thermal decomposition of ammonium hexachloroosmate
Source: Royal Society of Chemistry journal article supplement (doi:10.1039/c6cp07133c), 2016-01-01

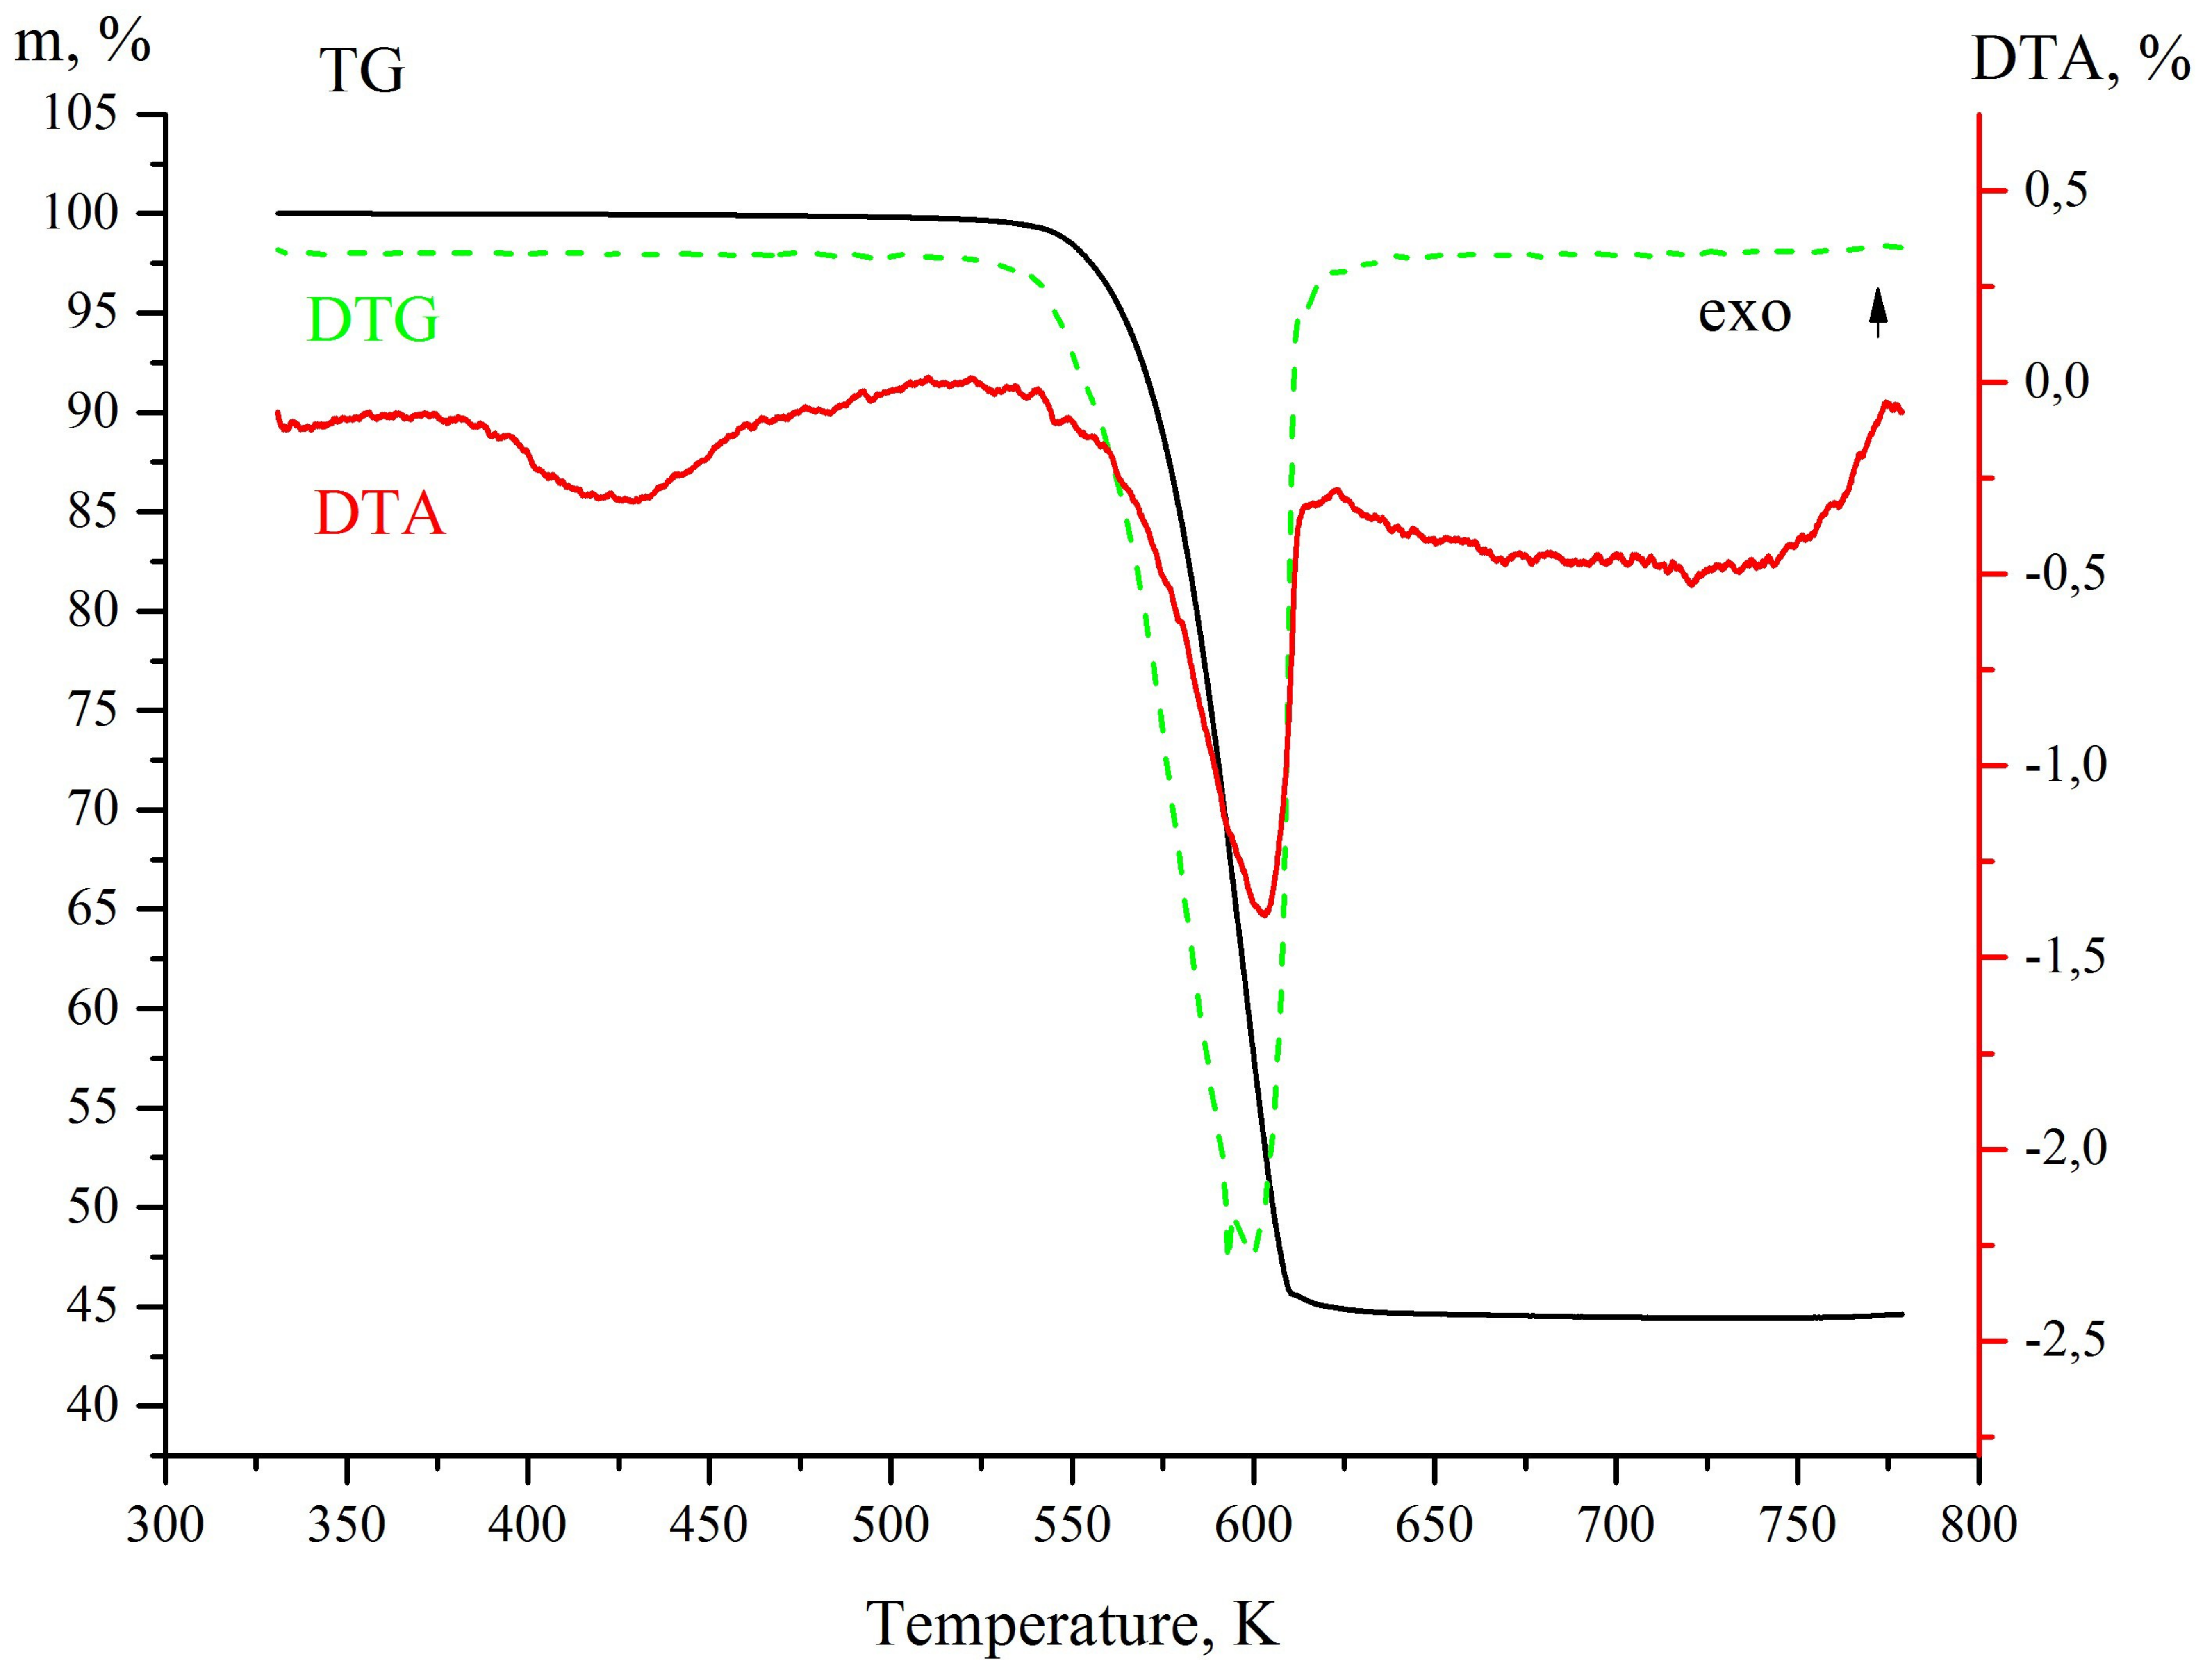

Supplement: c6cp07133c2.pdf [file c6cp07133c2.pdf]

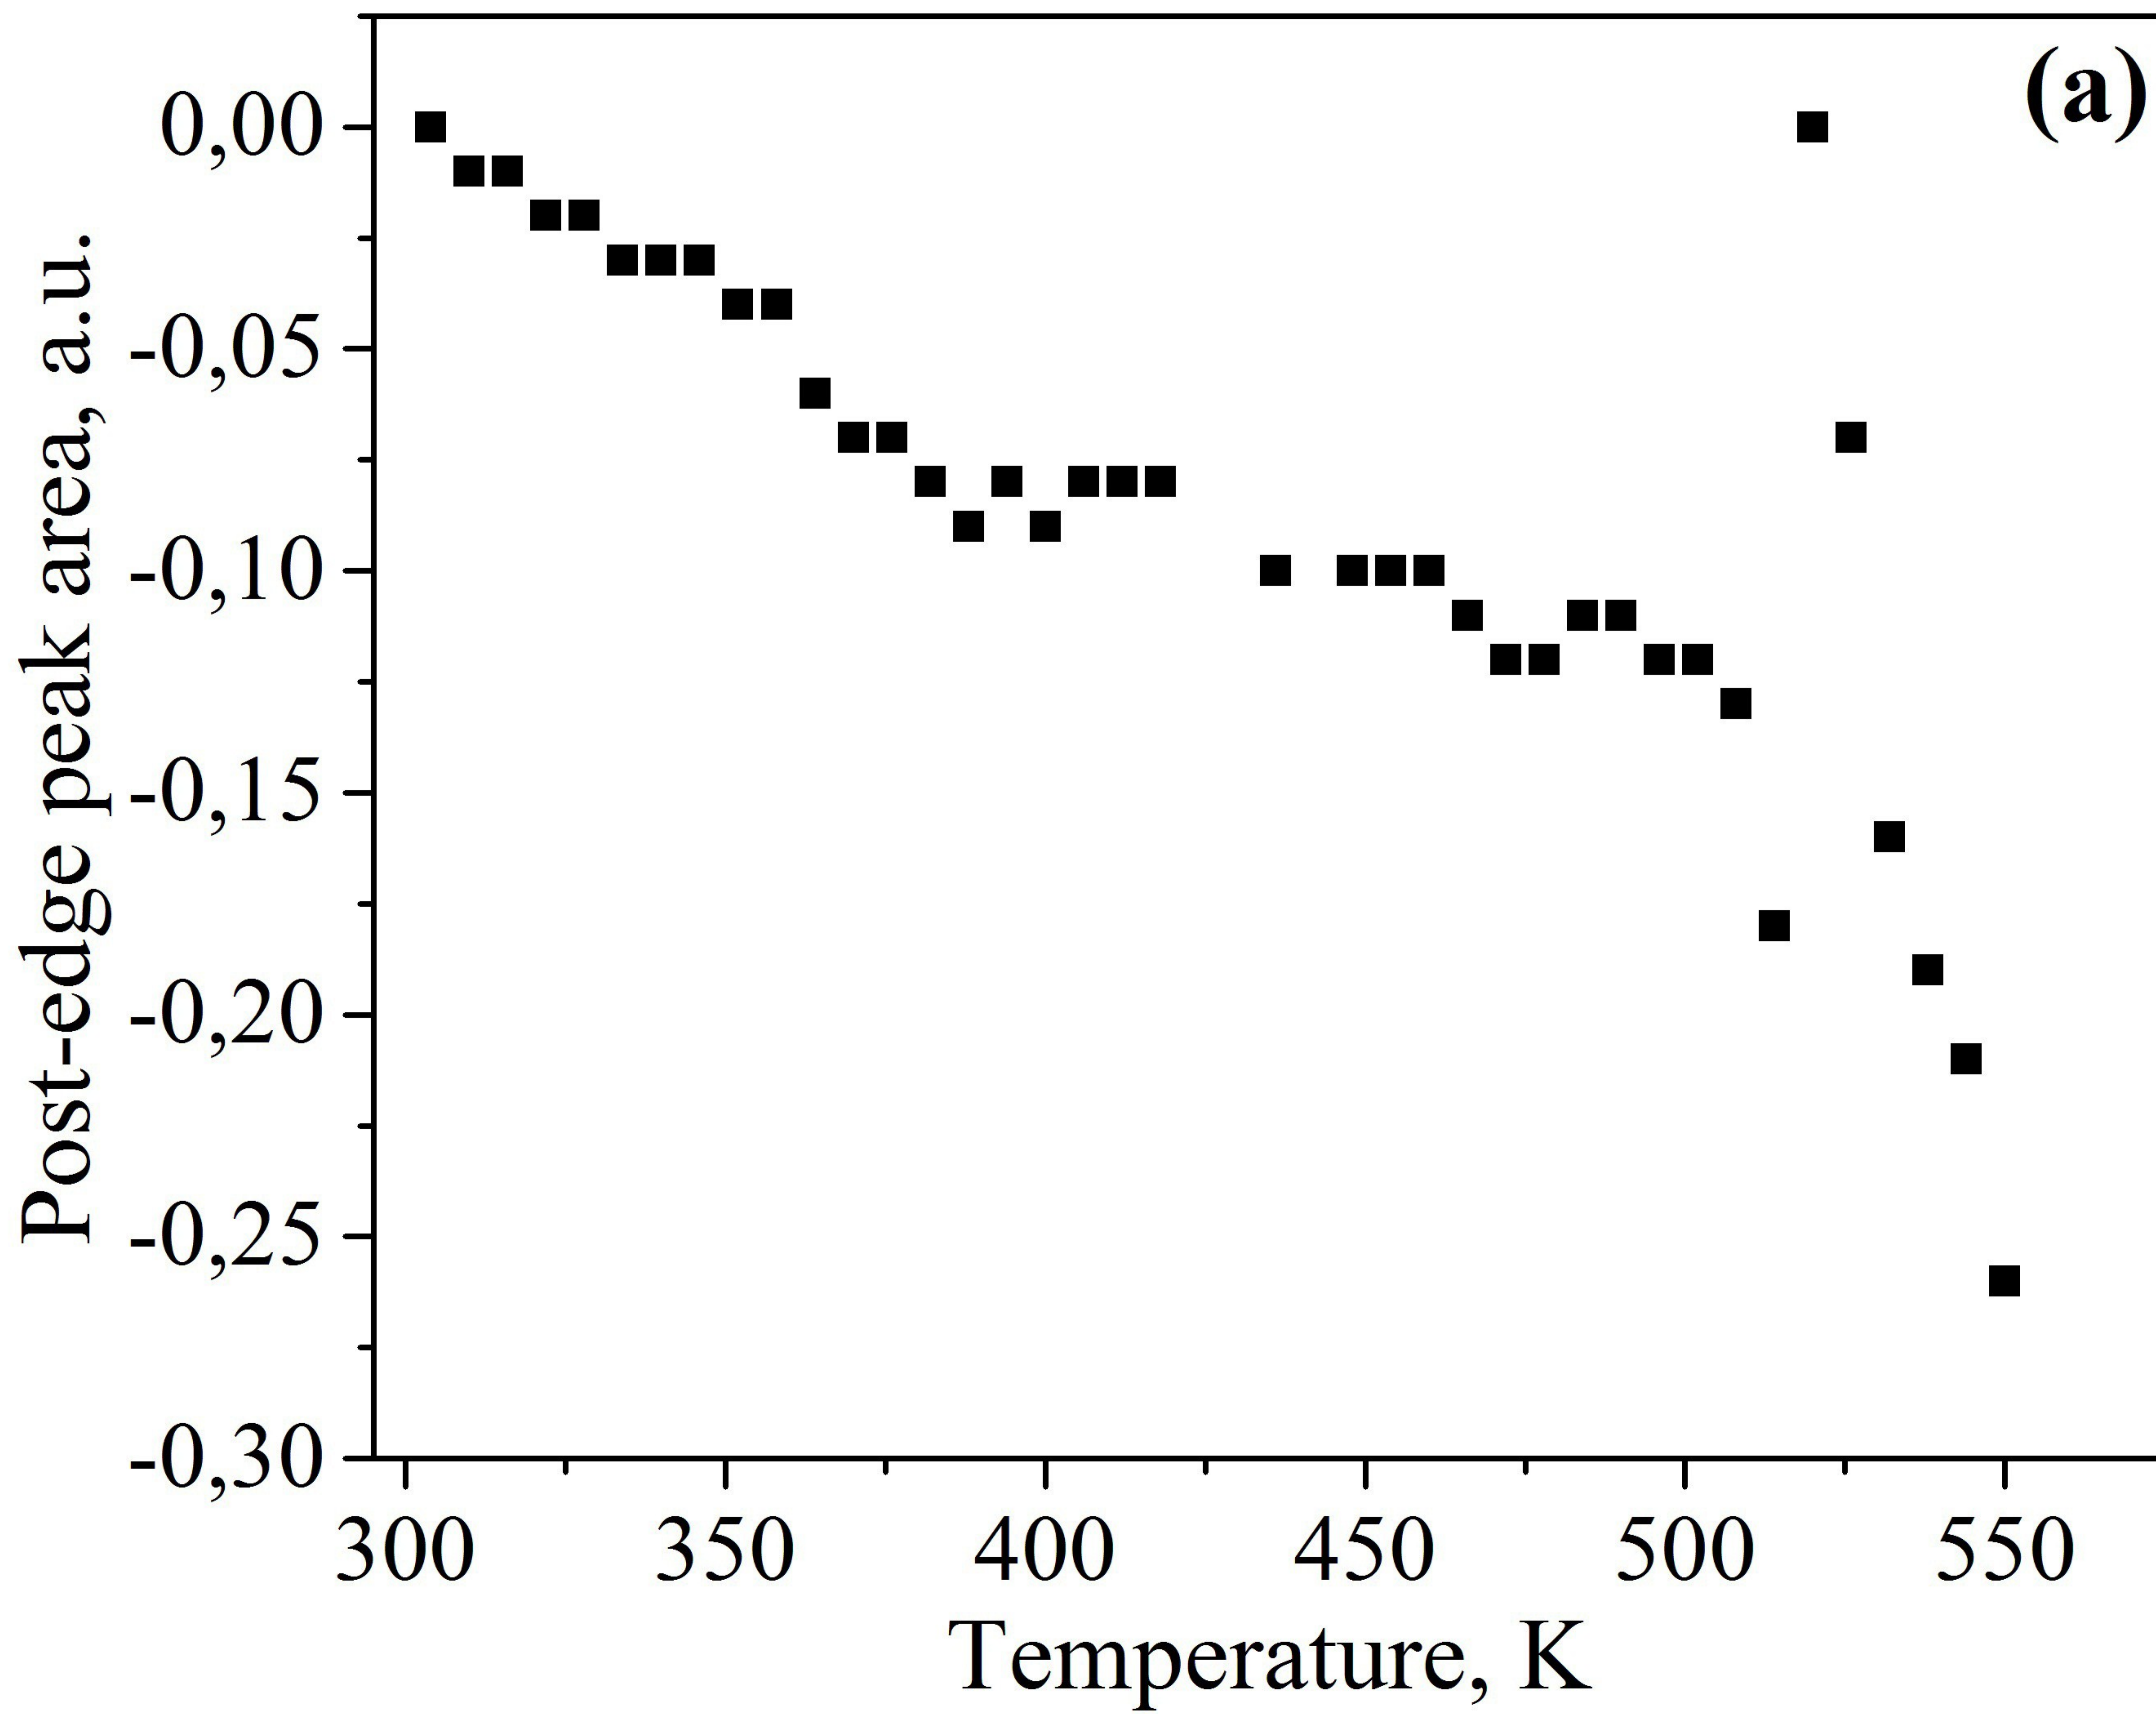

Supplement: c6cp07133c3.pdf [file c6cp07133c3.pdf]

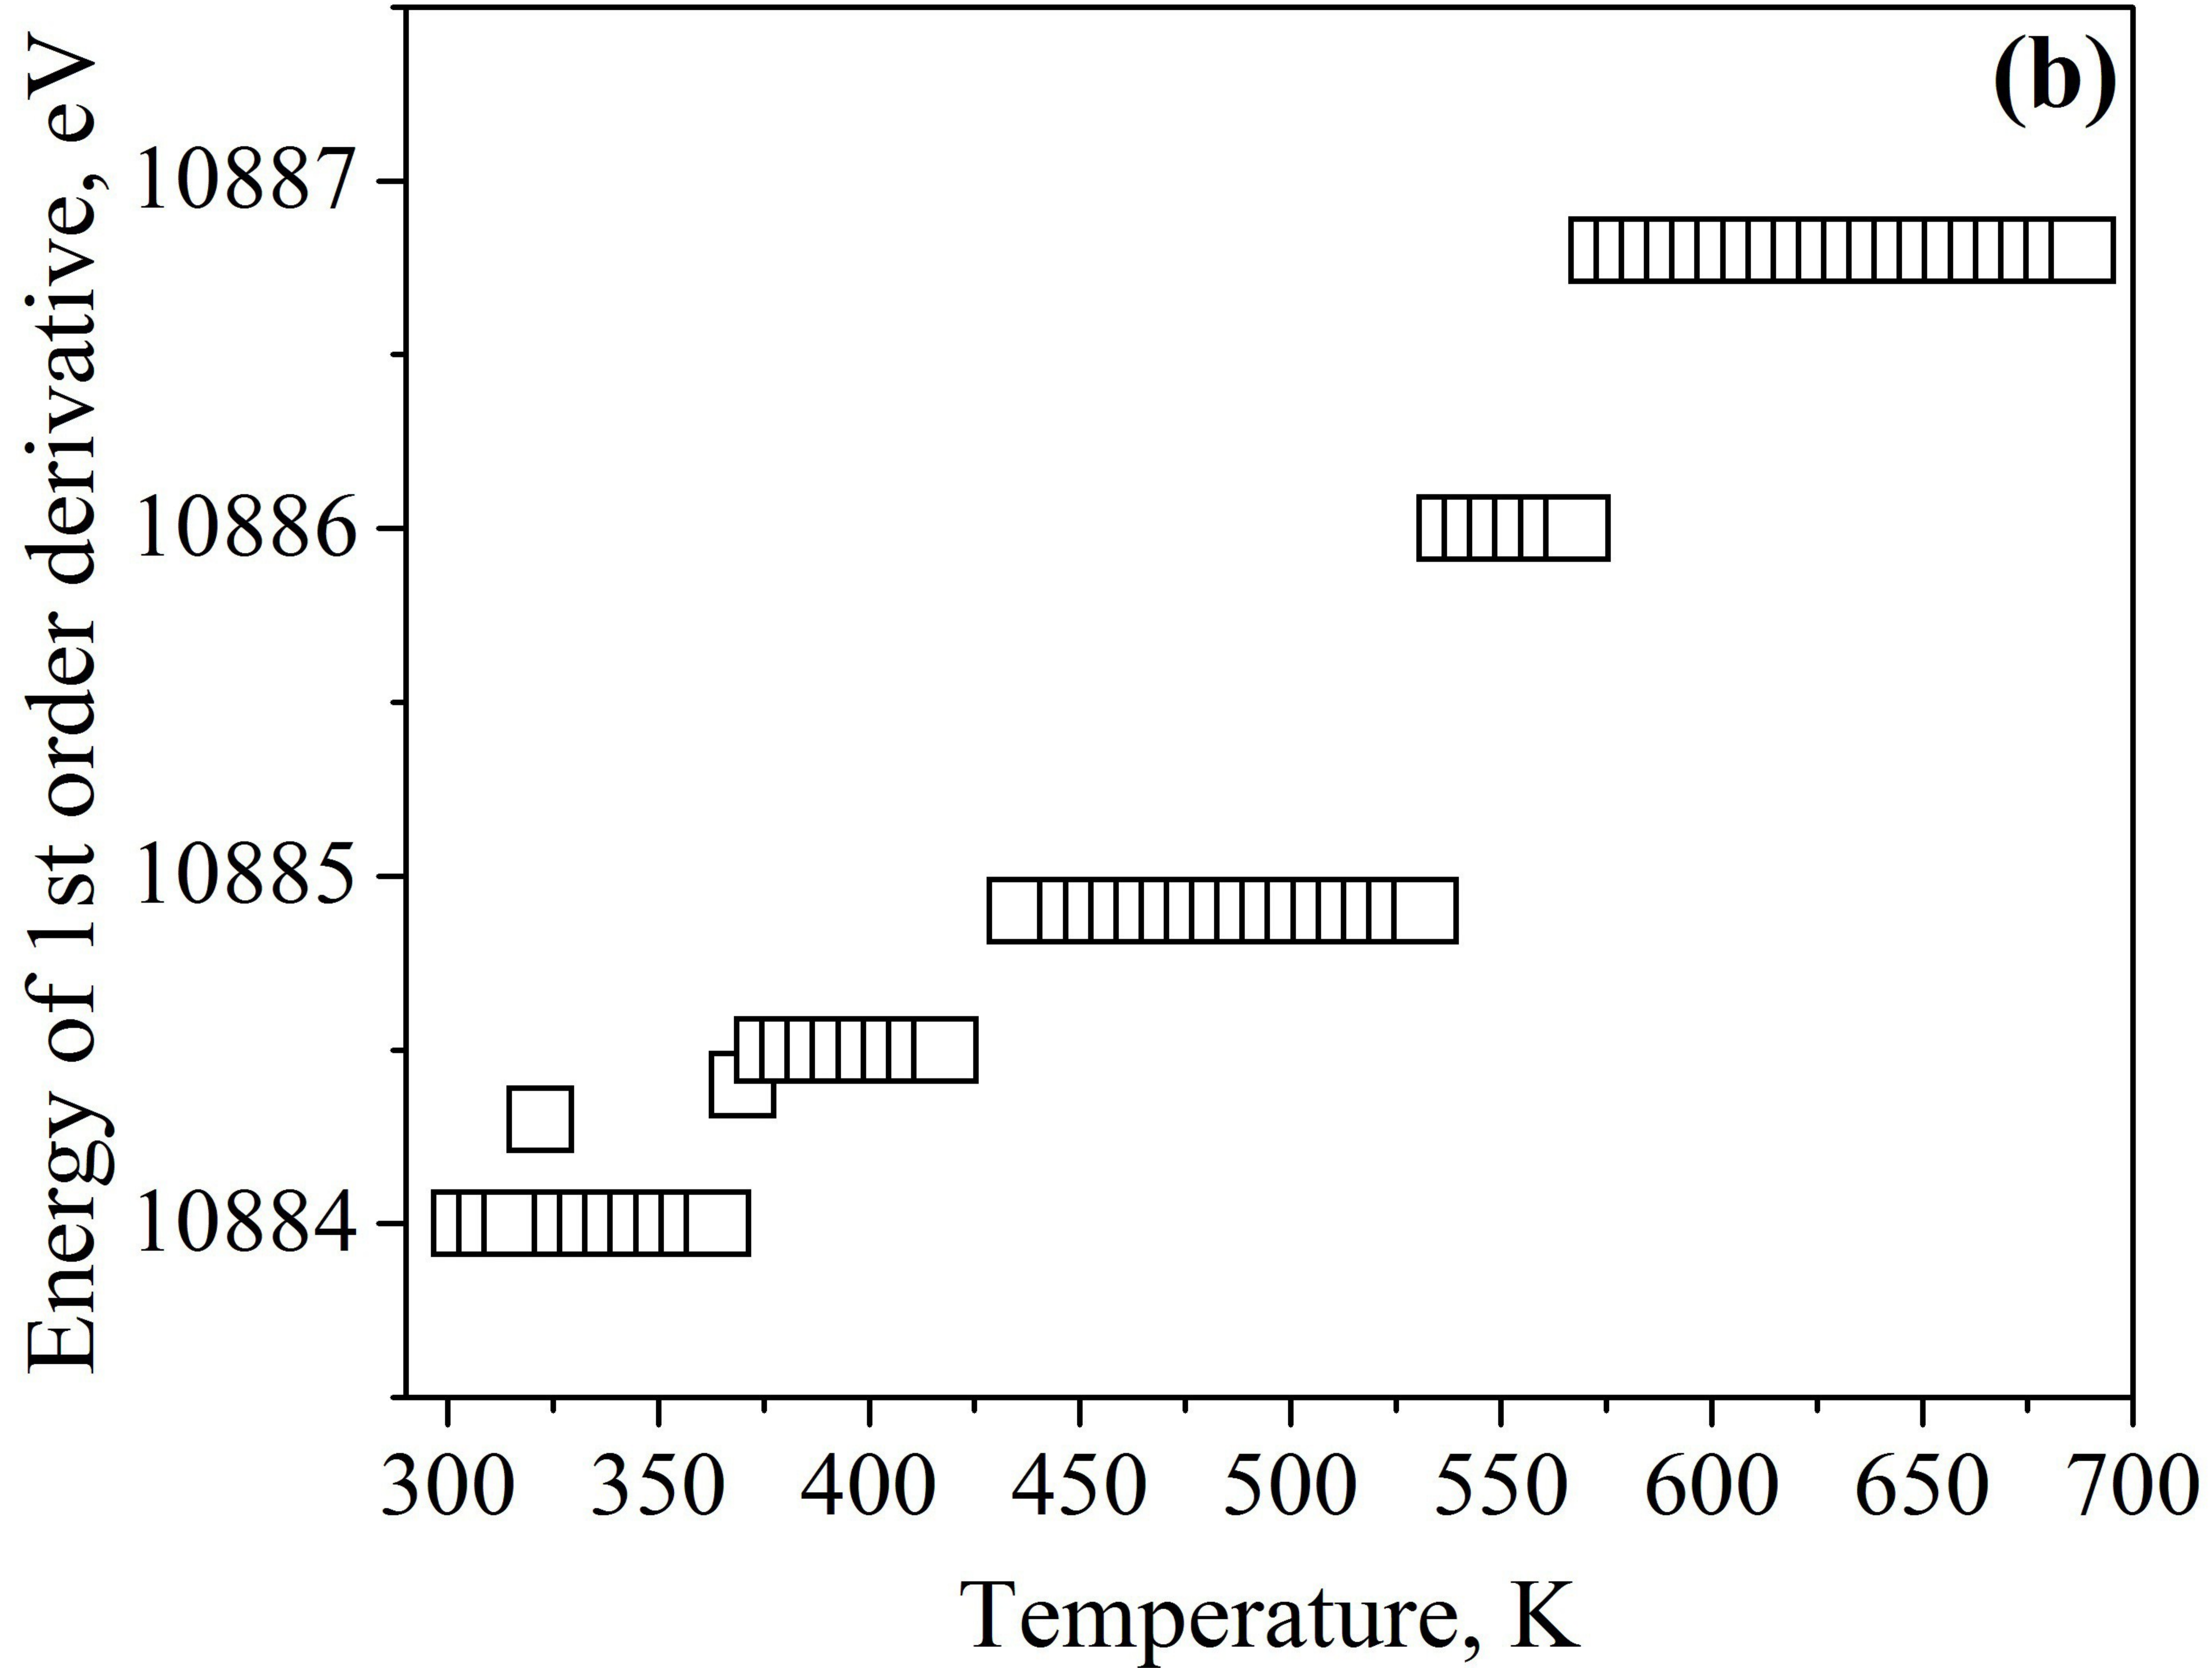

Supplement: c6cp07133c4.pdf [file c6cp07133c4.pdf]

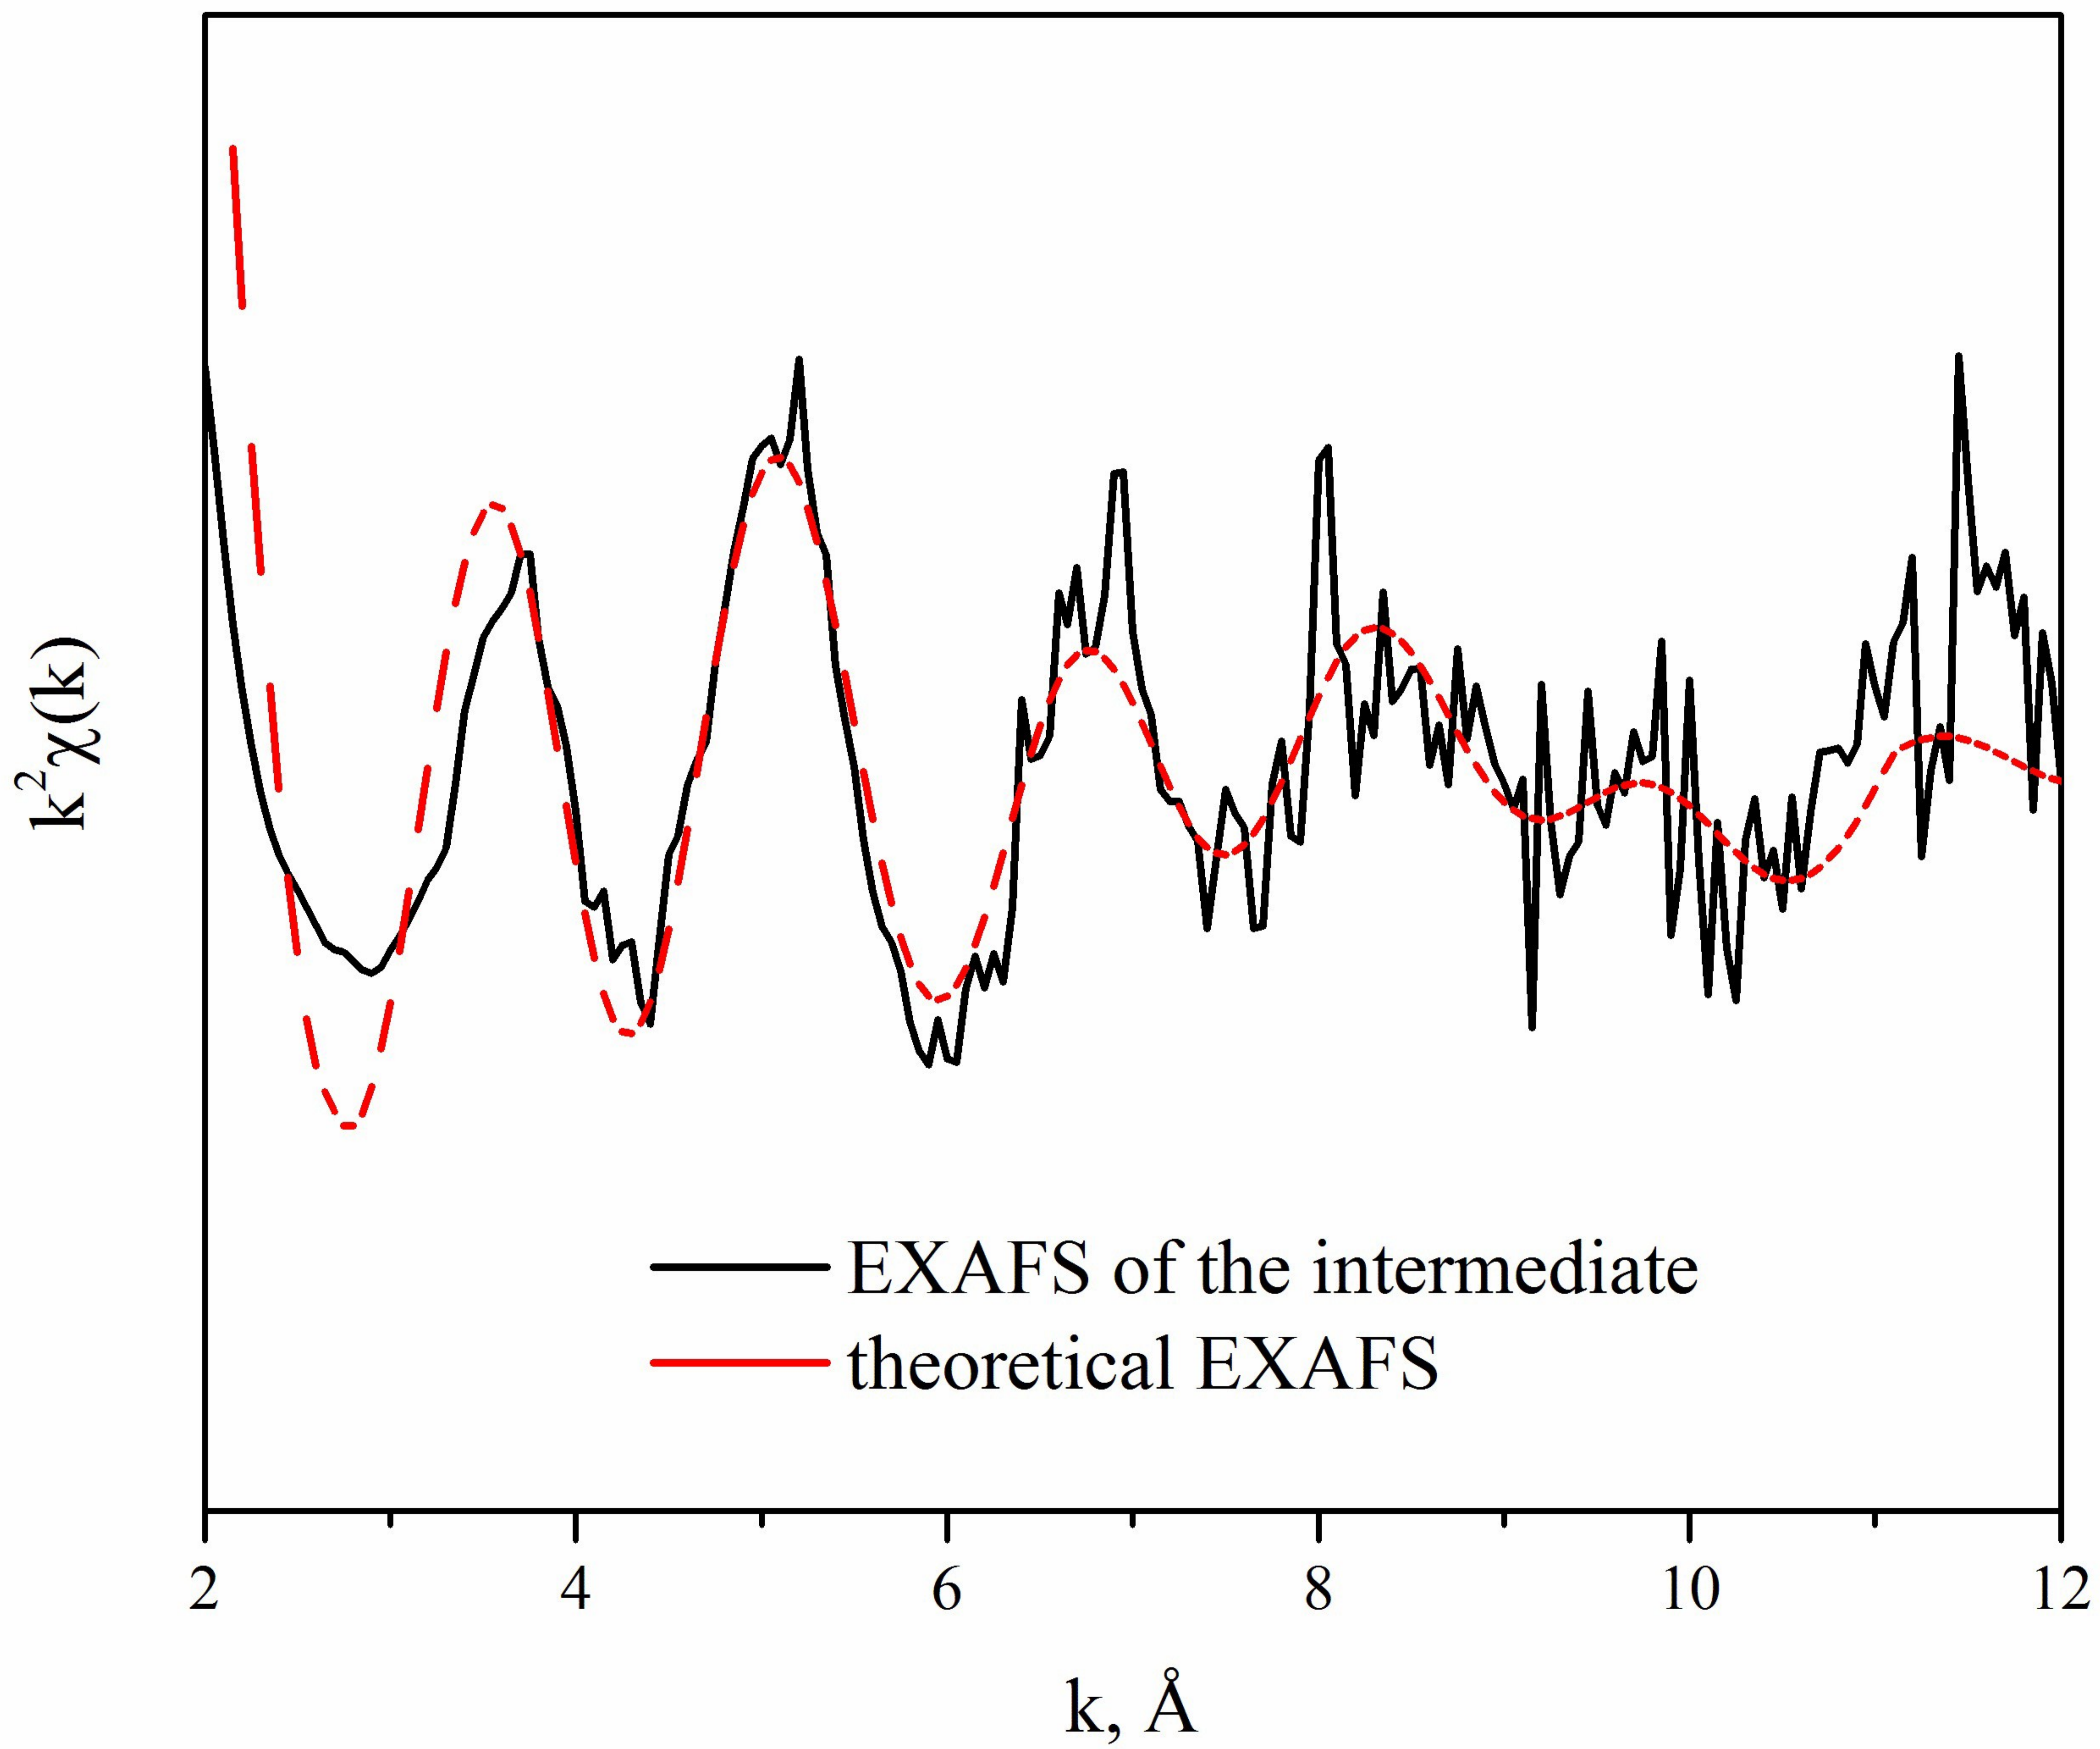

Supplement: c6cp07133c5.pdf [file c6cp07133c5.pdf]
